# Supplementary material for: Maf1 suppression of ATF5-dependent mitochondrial unfolded protein response contributes to rapamycin-induced radio-sensitivity in lung cancer cell line A549
Source: Aging (Albany NY). 2021 Feb 26;13(5):7300–13. doi: 10.18632/aging.202584 (PMC7993702; doi:10.18632/aging.202584)
Supplement: Supplementary Methods [file aging-13-202584-s001.pdf]

## SUPPLEMENTARY MATERIALS

### Supplemental Methods

#### MTT viability assay

MTT Cell Growth Assay Kit (CT02) was purchased from Millipore and experiment was conducted according to manufacturer's protocol. Briefly, A549 cells were cultured at 96-well plate as indicated by different experiments. MTT reagent was equilibrated in PBS buffer at room temperature to 5 mg/ml before use. Cells were removed of medium and 20  $\mu$ l MTT working

solution was added to each well, then incubated at 37° C for 4 hours. The MTT solution was carefully removed by aspiration. 0.1 mL isopropanol with 0.04 N HCl was added to each well to dissolve the purple formazan crystals. The optical density (OD) was measured on an ELISA plate reader with a test wavelength of 570 nm and a reference wavelength of 630 nm. Data of 3 replicates were averaged and normalized to indicated controls.
